# Supplementary material for: Facile Synthesis of MoP-RuP2 with Abundant Interfaces to Boost Hydrogen Evolution Reactions in Alkaline Media
Source: MDPI journal article supplement (doi:10.3390/nano11092347), 2021-09-09
Supplement: s1 [file s1]

Supplementary Materials

# Facile Synthesis of MoP-RuP<sub>2</sub> with Abundant Interfaces to Boost Hydrogen Evolution Reactions in Alkaline Media

Zhi Chen, Ying Zhao, Yuxiao Gao, Zexing Wu \* and Lei Wang \*

State Key Laboratory Base of Eco-Chemical Engineering, College of Chemistry and Molecular Engineering, Qingdao University of Science & Technology, 53 Zhengzhou Road, Qingdao 266042, China;

2020050008@mails.qust.edu.cn (Z.C.); zhaoying99up@163.com (Y.Z.); 2020050019@mails.qust.edu.cn (Y.G.)

\* Correspondence: splswzx@qust.edu.cn (Z.W.); inorchemwl@126.com (L.W.)

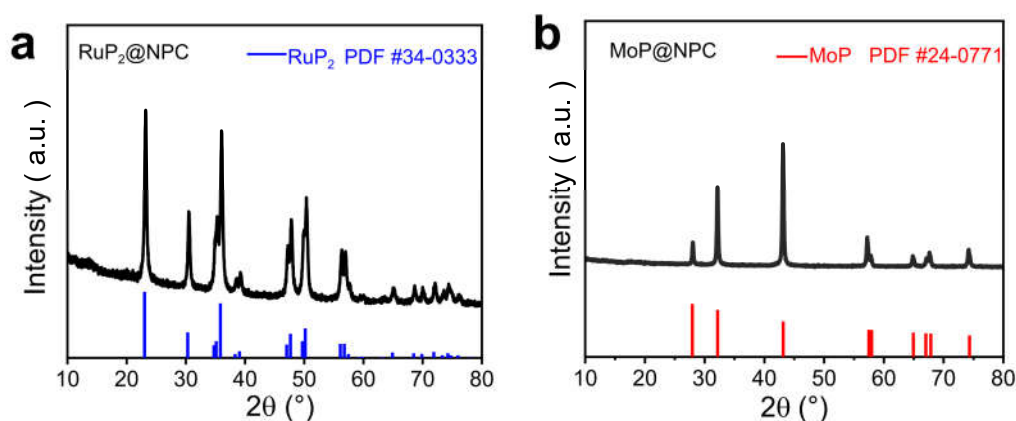

Figure S1. XRD patterns of RuP<sub>2</sub>@NPC (a) and MoP@NPC (b).

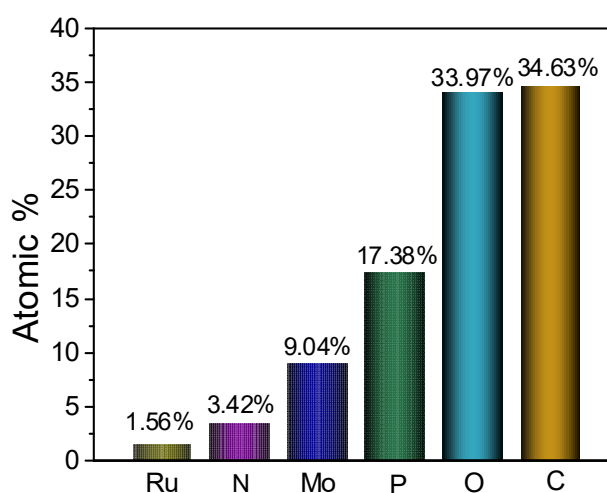

Figure S2. Atomic concentrations of MoP-RuP<sub>2</sub>@NPC in XPS (at%).

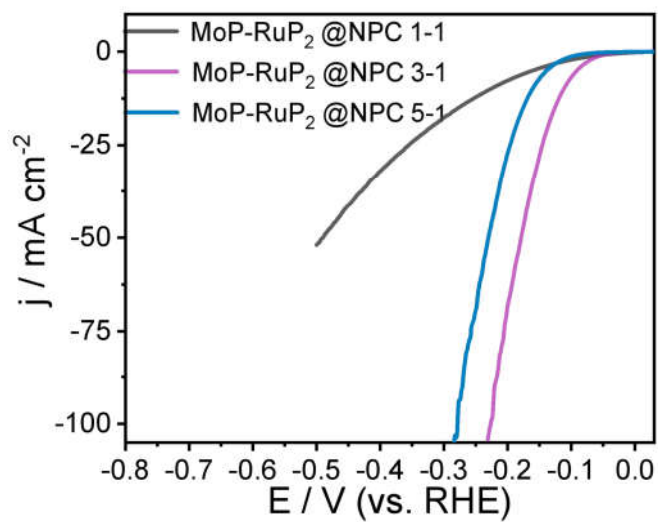

**Figure S3.** LSVs of MoP-RuP<sub>2</sub>@NPC with various different content for HER in 1 M KOH.

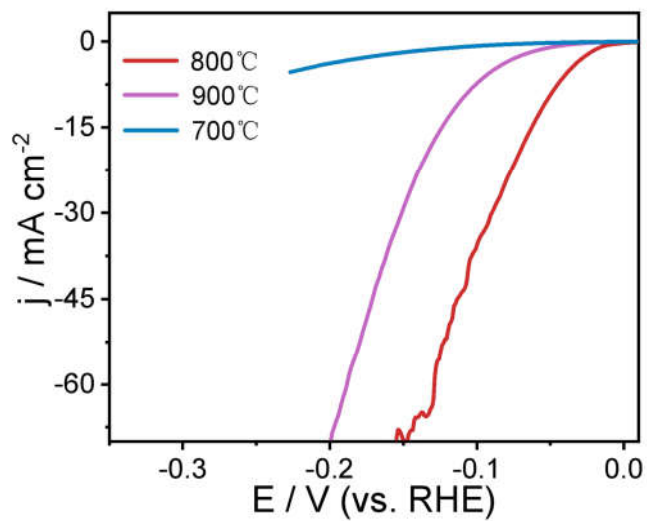

**Figure S4.** LSVs of MoP-RuP<sub>2</sub>@NPC with different temperatures for HER in 1 M KOH.

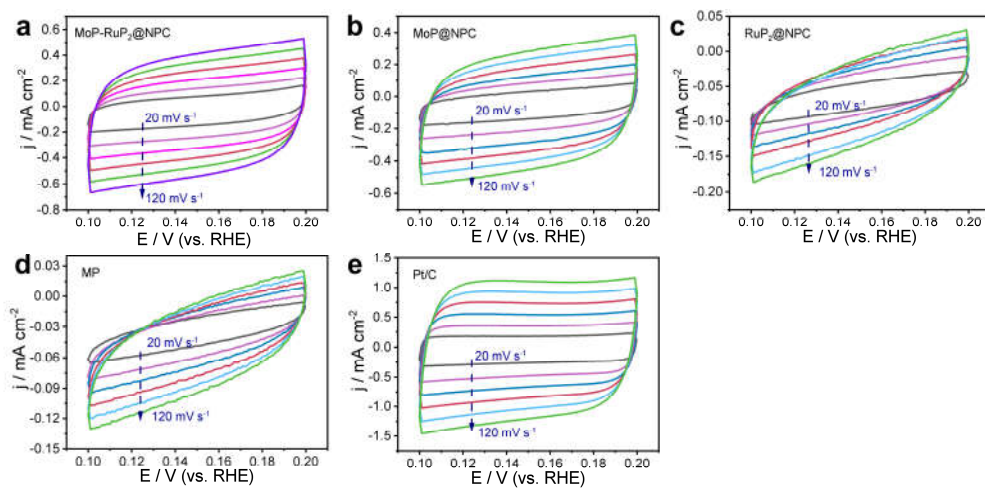

**Figure S5.** CV curves of MoP-RuP<sub>2</sub>@NPC (a), MoP@NPC (b), RuP<sub>2</sub>@NPC (c), MP (d) and Pt/C (e) at different scan rate in 1M KOH.

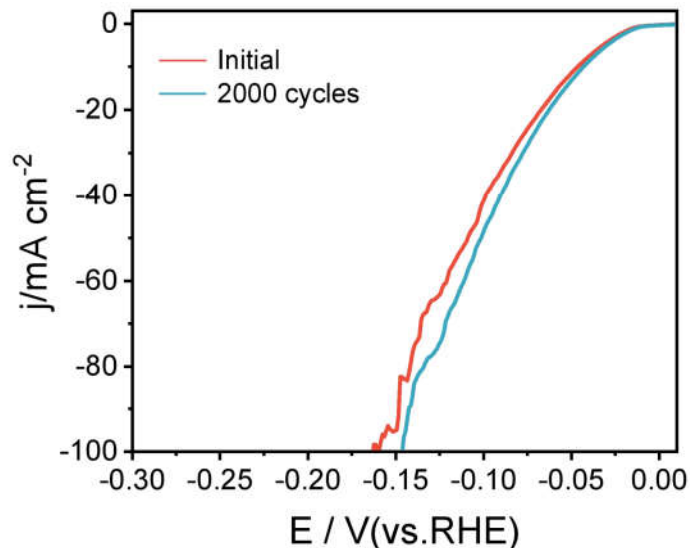

**Figure S6.** Stability test for MoP-RuP<sub>2</sub>@NPC via CV scanning for 2000 cycles in 1 M KOH for HER.

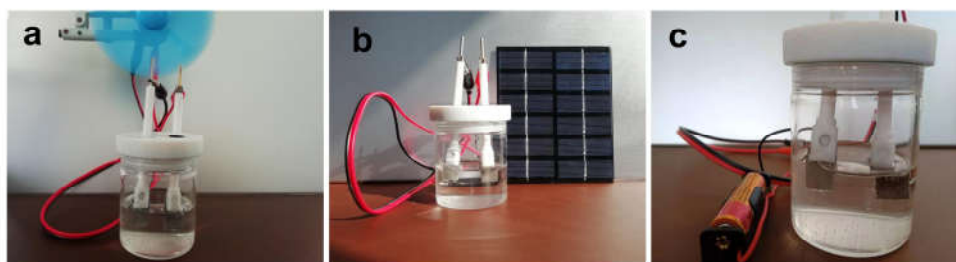

**Figure S7.** The diagram of the electrocatalytic overall water-splitting with the electric energy generated by wind (a), solar (b), battery (c).

**Table S1.** Comparison of the electrocatalytic performance toward HER in 1 M KOH.

| Catalysts                                   | Electrolyte | Overpotential@10<br>mAcm <sup>-1</sup> (mV) | Tafel Slope<br>(mV dec <sup>-1</sup> ) | Reference |
|---------------------------------------------|-------------|---------------------------------------------|----------------------------------------|-----------|
| MoP-RuP <sub>2</sub> /NPC                   | 1M KOH      | 50                                          | 27.97                                  | This work |
| Mo <sub>2</sub> C/W <sub>2</sub> C          | 1M KOH      | 132                                         | 76                                     | 1         |
| Ni-S                                        | 1M KOH      | 58                                          | 81.6                                   | 2         |
| Ni-Se-Cu                                    | 1M KOH      | 136                                         | 117.5                                  | 3         |
| WS <sub>2</sub> /CoS <sub>2</sub> /CC       | 1M KOH      | 122                                         | 93                                     | 4         |
| HEI                                         | 1M KOH      | 88.2                                        | 40.1                                   | 5         |
| CoP nanoparticles                           | 1M KOH      | 87                                          | 105                                    | 6         |
| Ni-Fe-Sn                                    | 1M KOH      | 253                                         | 61.5                                   | 7         |
| Ni-Co-P / NF                                | 1M KOH      | 85                                          | 46                                     | 8         |
| NF @ Ni <sub>3</sub> S <sub>2</sub> @ NCNTs | 1M KOH      | 93.89                                       | 54                                     | 9         |
| MoS <sub>2</sub>                            | 1M KOH      | 117                                         | 38                                     | 10        |

## References

- Ling, Y.; Kazim, F. M. D. ; Zhang, Q.; Xiao, S.; Li, M.; Yang, Z. Construction of Mo<sub>2</sub>C/W<sub>2</sub>C heterogeneous electrocatalyst for efficient hydrogen evolution reaction. *Int. J. Hydrogen Energy*, 2021, **46**, 9699–9706.
- Wu, Y.; Lian, J.; Wang, Y.; Sun, J.; He, Z.; Gu, Z. Potentiostatic electrodeposition of self-supported Ni S electrocatalyst supported on Ni foam for efficient hydrogen evolution. *Mater. Des.*, 2021, **198**.

3. Gao, Y.; Wu, Y.; He, H.; Tan, W. Potentiostatic electrodeposition of Ni-Se-Cu on nickel foam as an electrocatalyst for hydrogen evolution reaction. *J. Colloid Interface Sci.*, 2020, **578**, 555–564.
4. Wu, J.; Chen, T.; Zhu, C.; Du, J.; Huang, L.; Yan, J.; Cai, D.; Guan, C.; Pan, C. Rational Construction of a WS<sub>2</sub>/CoS<sub>2</sub> Heterostructure Electrocatalyst for Efficient Hydrogen Evolution at All pH Values. *ACS Sustainable Chem. Eng.*, 2020, **8**, 4474–4480.
5. Jia, Z.; Yang, T.; Sun, L.; Zhao, Y.; Li, W.; Luan, J.; Lyu, F.; Zhang, L.; Kruzic, J. J.; Kai, J.; Huang, J.; Lu, J.; Liu, C. A Novel Multinary Intermetallic as an Active Electrocatalyst for Hydrogen Evolution. *Adv. Mater.*, 2020, **32**, e2000385.
6. Luo, S.; Hei, P.; Wang, R.; Yin, J.; Hong, W.; Liu, S.; Bai, Z.; Jiao, T. Facile synthesis of cobalt phosphide nanoparticles as highly active electrocatalysts for hydrogen evolution reaction. *Colloids Surf., A*, 2020, **600**.
7. Wu, Y.; Gao, Y.; He, H.; Zhang, P. Electrodeposition of self-supported Ni–Fe–Sn film on Ni foam: An efficient electrocatalyst for oxygen evolution reaction. *Electrochim. Acta*, 2019, **301**, 39–46.
8. Zhou, W.; Zhao, J.; Guan, J.; Wu, M.; Li, G. Ni<sub>3</sub>S<sub>2</sub> in Situ Grown on Ni Foam Coupled with Nitrogen-Doped Carbon Nanotubes as an Efficient Electrocatalyst for the Hydrogen Evolution Reaction in Alkaline Solution. *ACS Omega*, 2019, **4**, 20244–20251.
9. Zhu, P.; Chen, Y.; Zhou, Y.; Yang, Z.; Wu, D.; Xiong, X.; Ouyang, F. A metallic MoS<sub>2</sub> nanosheet array on graphene-protected Ni foam as a highly efficient electrocatalytic hydrogen evolution cathode. *J. Mater. Chem. A*, 2018, **6**, 16458–16464.
10. Liu, Z.; Wang, J.; Zhan, C.; Yu, J.; Cao, Y.; Tu, J.; Shi, C. Phosphide-oxide honeycomb-like heterostructure CoP@CoMoO<sub>4</sub>/CC for enhanced hydrogen evolution reaction in alkaline solution. *J. Mater. Sci. Technol.*, 2020, **46**, 177–184.
